# Supplementary material for: Prevalence and characterization of antimicrobial-resistant Escherichia coli in chicken meat from wet markets in Hong Kong
Source: Front Vet Sci. 2024 Jan 15;11:1340548. doi: 10.3389/fvets.2024.1340548 (PMC10822974; doi:10.3389/fvets.2024.1340548)
Supplement: Supplementary file 1 [file Table_1.XLSX]

## Sheet: ESBL
SL No	Unique ID	Cefotaxime (30 μg) [CTX] (Sensitive : ≥ 26 mm Intermediate : 23-25 mm Resistant : ≤ 22 mm)	Cefotaxime-clavulanic acid (30 μg-10 μg) [CTX_CLA]	Ceftazidime (30 μg) [CAZ] (Sensitive : ≥ 21 mm Intermediate : 18-20 mm Resistant : ≤ 17 mm)	Ceftazidime-clavulanic acid (30 μg-10 μg) [CAZ_CLA]	Interpretation	Cefepime screening	Cefepime [CEF] [Sensitive (>= 25) Intermediate (19-24) Resistant (<=18)]	Cefepime-Clavulanic acid [CEF_CLA]	Interpretation
1	50	no inhibition zone	20	12	25	ESBL positive	NA
2	61	no inhibition zone	30	18	25	ESBL positive	NA
3	62	12	28	19	28	ESBL positive	NA
4	67	no inhibition zone	27	18	30	ESBL positive	NA
5	69	15	28	22	28	ESBL positive	NA
6	70	11	25	18	25	ESBL positive	NA
7	82	no inhibition zone	25	25	30	ESBL positive	NA
8	93	no inhibition zone	25	18	25	ESBL positive	NA
9	94	no inhibition zone	22	20	27	ESBL positive	NA
10	95	no inhibition zone	22	17	25	ESBL positive	NA
11	96	no inhibition zone	25	17	25	ESBL positive	NA
12	99	13	23	22	25	ESBL positive	NA
13	100	20	22	16	20	-	Confirm with Cefepime	17	32	ESBL positive
14	101	no inhibition zone	25	22	23	ESBL positive	NA
15	102	no inhibition zone	25	20	25	ESBL positive	NA
16	113	no inhibition zone	28	17	28	ESBL positive	NA
17	114	no inhibition zone	25	15	25	ESBL positive	NA
18	125	no inhibition zone	18	15	25	ESBL positive	NA
19	149	11	13	no inhibition zone	18	ESBL positive	NA
20	150	no inhibition zone	22	25	28	ESBL positive	NA
21	151	no inhibition zone	25	13	25	ESBL positive	NA
22	160	no inhibition zone	30	18	30	ESBL positive	NA
23	161	12	30	20	30	ESBL positive	NA
24	164	15	30	22	32	ESBL positive	NA
25	165	16	30	23	32	ESBL positive	NA
26	178	no inhibition zone	30	18	32	ESBL positive	NA
27	179	15	32	25	31	ESBL positive	NA
28	180	no inhibition zone	30	20	33	ESBL positive	NA
29	181	no inhibition zone	28	17	30	ESBL positive	NA
30	192	12	30	25	30	ESBL positive	NA
31	193	14	30	22	30	ESBL positive	NA
32	194	15	32	25	30	ESBL positive	NA
33	195	20	30	23	32	ESBL positive	NA
34	196	13	32	23	32	ESBL positive	NA
35	207	13	33	22	32	ESBL positive	NA
36	209	13	30	18	30	ESBL positive	NA
37	220	no inhibition zone	25	23	32	ESBL positive	NA
38	221	no inhibition zone	30	22	30	ESBL positive	NA
39	222	no inhibition zone	25	25	28	ESBL positive	NA
40	223	12	30	22	28	ESBL positive	NA
41	224	no inhibition zone	25	no inhibition zone	25	ESBL positive	NA
42	225	no inhibition zone	28	no inhibition zone	25	ESBL positive	NA
43	226	no inhibition zone	17	12	18	ESBL positive	NA
44	227	no inhibition zone	28	20	30	ESBL positive	NA
45	228	no inhibition zone	28	18	28	ESBL positive	NA
46	229	no inhibition zone	25	13	25	ESBL positive	NA
47	230	no inhibition zone	23	13	23	ESBL positive	NA
48	231	10	29	20	22	ESBL positive	NA
49	242	12	25	20	25	ESBL positive	NA
50	243	15	30	22	25	ESBL positive	NA
51	244	10	25	20	30	ESBL positive	NA
52	245	no inhibition zone	30	20	30	ESBL positive	NA
53	246	no inhibition zone	28	20	30	ESBL positive	NA
54	247	no inhibition zone	25	15	28	ESBL positive	NA
55	248	no inhibition zone	26	20	30	ESBL positive	NA
56	249	no inhibition zone	27	20	30	ESBL positive	NA
57	250	11	29	17	30	ESBL positive	NA
58	251	no inhibition zone	26	18	30	ESBL positive	NA
59	252	no inhibition zone	25	20	32	ESBL positive	NA
60	253	no inhibition zone	25	15	22	ESBL positive	NA
61	254	no inhibition zone	28	22	28	ESBL positive	NA
62	255	no inhibition zone	26	20	30	ESBL positive	NA
63	256	no inhibition zone	30	20	29	ESBL positive	NA
64	257	no inhibition zone	28	20	28	ESBL positive	NA
65	258	no inhibition zone	30	22	30	ESBL positive	NA
66	259	12	32	20	28	ESBL positive	NA
67	260	no inhibition zone	20	18	23	ESBL positive	NA
68	269	no inhibition zone	32	21	27	ESBL positive	NA
69	270	15	30	20	30	ESBL positive	NA
70	275	no inhibition zone	15	20	28	ESBL positive	NA
71	276	no inhibition zone	30	20	25	ESBL positive	NA
72	290	no inhibition zone	29	20	29	ESBL positive	NA
73	302	no inhibition zone	26	16	26	ESBL positive	NA
74	303	no inhibition zone	28	20	24	ESBL positive	NA
75	306	no inhibition zone	28	16	30	ESBL positive	NA
76	307	no inhibition zone	26	24	30	ESBL positive	NA
77	308	no inhibition zone	23	20	26	ESBL positive	NA
78	309	no inhibition zone	22	20	26	ESBL positive	NA
79	310	no inhibition zone	22	12	26	ESBL positive	NA
80	311	no inhibition zone	26	22	28	ESBL positive	NA
81	312	no inhibition zone	24	20	26	ESBL positive	NA
82	313	no inhibition zone	20	18	28	ESBL positive	NA
83	314	no inhibition zone	28	20	28	ESBL positive	NA
84	315	no inhibition zone	28	20	28	ESBL positive	NA
85	316	no inhibition zone	26	16	26	ESBL positive	NA
86	317	no inhibition zone	28	16	28	ESBL positive	NA
87	318	no inhibition zone	26	14	28	ESBL positive	NA
88	319	no inhibition zone	30	18	28	ESBL positive	NA
89	320	no inhibition zone	22	20	25	ESBL positive	NA
90	321	12	27	20	30	ESBL positive	NA
91	322	no inhibition zone	16	16	28	ESBL positive	NA
92	323	no inhibition zone	24	16	24	ESBL positive	NA
93	324	no inhibition zone	30	20	28	ESBL positive	NA
94	325	no inhibition zone	24	16	26	ESBL positive	NA
95	326	no inhibition zone	28	18	24	ESBL positive	NA
96	327	no inhibition zone	22	12	22	ESBL positive	NA
97	328	no inhibition zone	28	18	26	ESBL positive	NA
98	329	no inhibition zone	30	24	32	ESBL positive	NA
99	330	no inhibition zone	24	18	27	ESBL positive	NA
100	331	no inhibition zone	28	18	25	ESBL positive	NA
101	332	no inhibition zone	26	18	24	ESBL positive	NA
102	333	no inhibition zone	24	14	24	ESBL positive	NA
103	334	no inhibition zone	26	16	26	ESBL positive	NA
104	335	no inhibition zone	25	20	26	ESBL positive	NA
105	336	no inhibition zone	24	no inhibition zone	24	ESBL positive	NA
106	337	no inhibition zone	13	no inhibition zone	24	ESBL positive	NA
107	338	16	20	16	20	-	Confirm with Cefepime	15	22	ESBL positive
108	339	no inhibition zone	12	no inhibition zone	13	ESBL positive	NA
109	340	no inhibition zone	no inhibition zone	no inhibition zone	13	ESBL positive	NA
110	351	no inhibition zone	28	16	24	ESBL positive	NA
111	352	13	30	26	29	ESBL positive	NA
112	353	12	28	18	24	ESBL positive	NA
113	354	no inhibition zone	30	24	30	ESBL positive	NA
114	355	no inhibition zone	30	20	30	ESBL positive	NA
115	356	no inhibition zone	26	20	26	ESBL positive	NA
116	357	no inhibition zone	25	18	28	ESBL positive	NA
117	358	12	22	20	28	ESBL positive	NA
118	359	no inhibition zone	28	24	30	ESBL positive	NA
119	360	no inhibition zone	26	20	30	ESBL positive	NA
120	361	no inhibition zone	28	18	30	ESBL positive	NA
121	363	no inhibition zone	26	16	24	ESBL positive	NA
122	364	no inhibition zone	24	14	24	ESBL positive	NA
123	365	no inhibition zone	28	18	26	ESBL positive	NA
124	366	no inhibition zone	22	15	26	ESBL positive	NA
125	367	10	24	15	24	ESBL positive	NA
126	368	no inhibition zone	26	23	28	ESBL positive	NA
127	369	no inhibition zone	22	17	23	ESBL positive	NA
128	370	no inhibition zone	20	11	22	ESBL positive	NA
129	371	no inhibition zone	26	16	24	ESBL positive	NA
130	372	12	26	20	24	ESBL positive	NA
131	373	no inhibition zone	28	14	26	ESBL positive	NA
132	374	no inhibition zone	30	16	32	ESBL positive	NA
133	375	no inhibition zone	15	12	30	ESBL positive	NA
134	378	10	26	20	28	ESBL positive	NA
135	379	no inhibition zone	30	20	32	ESBL positive	NA
136	380	no inhibition zone	24	16	24	ESBL positive	NA
137	381	no inhibition zone	26	20	26	ESBL positive	NA
138	382	no inhibition zone	28	26	32	ESBL positive	NA
139	383	no inhibition zone	28	20	28	ESBL positive	NA
140	384	no inhibition zone	26	16	26	ESBL positive	NA
141	385	14	23	12	25	ESBL positive	NA
142	386	no inhibition zone	24	14	22	ESBL positive	NA
143	387	no inhibition zone	27	18	26	ESBL positive	NA
144	388	no inhibition zone	26	16	28	ESBL positive	NA
145	389	no inhibition zone	22	20	22	ESBL positive	NA
146	390	12	25	20	30	ESBL positive	NA
147	391	no inhibition zone	26	16	24	ESBL positive	NA
148	392	no inhibition zone	25	20	30	ESBL positive	NA
149	393	no inhibition zone	26	no inhibition zone	26	ESBL positive	NA
150	394	no inhibition zone	26	16	26	ESBL positive	NA
151	395	no inhibition zone	24	12	24	ESBL positive	NA
152	396	no inhibition zone	26	22	26	ESBL positive	NA
153	401	no inhibition zone	28	18	24	ESBL positive	NA
154	402	no inhibition zone	30	20	30	ESBL positive	NA
155	403	no inhibition zone	26	18	26	ESBL positive	NA
156	404	no inhibition zone	26	22	26	ESBL positive	NA
157	405	no inhibition zone	24	18	26	ESBL positive	NA
158	406	no inhibition zone	24	14	24	ESBL positive	NA
159	407	no inhibition zone	23	14	27	ESBL positive	NA
160	408	no inhibition zone	22	14	25	ESBL positive	NA

## Sheet: Colistin
Sl No.	Unique ID (Duplicates of each samples)	MIC Concentration (mg/liter)
		0.25	0.5	1	2	4	8	16	P	MIC level	Interpret MIC level	Interpretation
1	100	G	G	G	G	G	G		G	16
	100	G	G	G	G	G	G		G	16	16	CST
2	102	G	G	G	G	G	G		G	16
	102	G	G	G	G	G	G		G	16	16	CST
3	223	G	G	G	G				G	4
	223	G	G	G	G				G	4	4	CST
4	252	G	G	G	G	G			G	8
	252	G	G	G	G	G			G	8	8	CST
5	254	G	G	G	G	G			G	8
	254	G	G	G	G	G			G	8	8	CST
6	259	G	G	G	G				G	4
	259	G	G	G	G				G	4	4	CST
7	319	G	G	G	G				G	4
	319	G	G	G	G				G	4	4	CST
8	320	G	G	G	G	G			G	8
	320	G	G	G	G	G			G	8	8	CST
8	366	G	G	G	G	G			G	8
	366	G	G	G	G	G			G	8	8	CST
10	367	G	G	G	G	G	G		G	16
	367	G	G	G	G	G	G		G	16	16	CST
11	370	G	G	G	G	G			G	8
	370	G	G	G	G	G			G	8	8	CST
12	387	G	G	G	G				G	4
	387	G	G	G	G				G	4	4	CST
	Reference	G							G	0.5		In the range of interpretation (0.25-2)
	Reference	G							G	0.5	0.5	In the range of interpretation (0.25-2)
	Negative Control								G			Study process validated
		G= Growth observed
		Blank = No growth
